# Supplementary material for: Update from 2010 (standard operating procedure): protocol for the 2024 British Society of Gastroenterology Guidelines on colorectal surveillance in inflammatory bowel disease
Source: PubMed Central journal article supplement — BMJ Open Gastroenterol. 2024 Nov 29;11(1):e001541. doi: 10.1136/bmjgast-2024-001541 (PMC11624704; doi:10.1136/bmjgast-2024-001541), 2024-11-29
Supplement: bmjgast-11-1-s003.pdf [file bmjgast-11-1-s003.pdf]

## Searches:

Search Report: Strategies for Detecting Colon Cancer in Patients with Inflammatory Bowel Disease

**Search date: 11<sup>th</sup> September 2023**

**Number of results: 9425**

**Duplicates removed: 1682**

**Records to screen: 7734**

### Contents

|                     |   |
|---------------------|---|
| CENTRAL             | 1 |
| ClinicalTrials.gov  | 1 |
| Embase via Ovid SP  | 1 |
| MEDLINE via Ovid SP | 2 |
| WHO ICTRP           | 2 |

### CENTRAL

Issue 8 of 12, August 2023

Date Run: 11/09/2023 02:59:26

#1 ([mh "Inflammatory Bowel Disease"] OR Crohn\* OR Ulcerative Colitis OR IBD OR Inflammatory Bowel Disease\*) AND (Colon OR Colorectal OR Rectal) AND (Cancer\* OR Neoplas\* OR Dysplasia) AND (Detect\* OR Screen\* OR Diagnos\* OR Assess\* OR Surveillance) with Cochrane Library publication date, in Trials

ClinicalTrials.gov

Classic Interface

### Advanced Search

**Condition or disease:** (Crohn OR Ulcerative Colitis OR IBD OR Inflammatory Bowel Disease) AND (Colon Cancer OR Colorectal Cancer OR Rectal Cancer OR Colon Dysplasia OR Colorectal Dysplasia OR Rectal Dysplasia)

**Other terms:** Detection OR Screening OR Diagnosis OR Assessment OR Surveillance

Embase via Ovid SP

Database: Embase <1974 to 2023 September 08>

1 exp Inflammatory Bowel Disease/ or (Crohn\* or Ulcerative Colitis\* or IBD or Inflammatory Bowel Disease\*).mp. (241336)

2 (Colon or Colorectal or Rectal).mp. (831257)

3 (Cancer\* or Neoplas\* or Dysplasia).mp. (4993938)

4 (Detect\* or Screen\* or Diagnos\* or Assess\* or Surveillance).mp. (15712633)

5 and/1-4 (16015)

6 limit 5 to medline (791)

7 5 not 6 (15224)

8 limit 7 to dc=20160920-20230908 (7095)

9 limit 7 to dd=20160920-20230908 (3485)

10 8 or 9 (7104)

11 (rat or rats or mouse or mice or swine or porcine or murine or sheep or lambs or pigs or piglets or rabbit or rabbits or cat or cats or dog or dogs or cattle or bovine or monkey or monkeys or trout or marmoset\$1).ti. and animal experiment/ (1219722)

12 Animal experiment/ not (human experiment/ or human/) (2561951)

13 11 or 12 (2630003)

14 10 not 13 (6773)

MEDLINE via Ovid SP

Database: Ovid MEDLINE(R) ALL <1946 to September 08, 2023>

1 exp Inflammatory Bowel Disease/ or (Crohn\* or Ulcerative Colitis\* or IBD or Inflammatory Bowel Disease\*).mp. (140530)

2 (Colon or Colorectal or Rectal).mp. (490013)

3 (Cancer\* or Neoplas\* or Dysplasia).mp. (4120072)

4 (Detect\* or Screen\* or Diagnos\* or Assess\* or Surveillance).mp. (11357535)

5 and/1-4 (6355)

6 limit 5 to ed=20160920-20230908 (1776)

7 limit 5 to dt=20160920-20230908 (2072)

8 6 or 7 (2283)

9 exp Animals/ not Humans.sh. (5153293)

10 8 not 9 (2188)

WHO ICTRP

(Crohn OR Ulcerative Colitis OR IBD OR Inflammatory Bowel Disease) AND (Colon Cancer OR Colorectal Cancer OR Rectal Cancer OR Colon Dysplasia OR Colorectal Dysplasia OR Rectal Dysplasia) AND (Detection OR Screening OR Diagnosis OR Assessment OR Surveillance)

33 records for 33 trials found

## Search Report: Bowel Preparation for Colonoscopy in Inflammatory Bowel Disease

**Search date: 7<sup>th</sup> September 2023**

**Number of results: 2818**

**Duplicates removed: 738**

**Records to screen: 2080**

### Contents

|                     |   |
|---------------------|---|
| CENTRAL             | 1 |
| ClinicalTrials.gov  | 1 |
| Embase via Ovid SP  | 1 |
| MEDLINE via Ovid SP | 2 |
| WHO ICTRP           | 2 |

CENTRAL

Issue 8 of 12, August 2023

Date Run: 07/09/2023 14:50:02

#1 [mh Colonoscopy] OR [mh Sigmoidoscopy] OR [mh Endoscopy] OR (Colonoscop\* OR Coloscop\* OR Sigmoidoscop\* OR Sigmoidoscop\* or Endoscop\*):ti,ab,kw53128

#2 [mh Cathartics] OR [mh Anthraquinones] OR [mh Citrates] OR [mh Laxatives] OR [mh "Organometallic Compounds"] OR [mh "Organometallic Compounds"] OR [mh "Polyethylene Glycols"] OR [mh Phosphates] OR (((Bowel\* OR Colon\* OR Intestin\* OR Gut) near/2 (Preparat\* OR Clean\* OR Lavage\* OR Evacuant\* OR Purgat\*)) OR "2 (Ethylmercurithio)Benzoxazole 5 Carboxylate Sodium" or "Bis(Tributyltin) Oxide" or "1 Isopropoxygermatrane" or "4 Aminophenylmercuric Acetate" or "4 Chloromercuribenzoic Acid" or "4 Hydroxy 3 Methoxyphenylethylene Glycol Sulfate" or "4-Chloromercuribenzenesulfonate" or Acetphenolisatin or Acidulated Phosphate Fluoride or Actilax or Agar or Agarol or Alkylmercury Compound\* or Aloe Emodin or Aloe Vera or Aloin or Alum Compound\* or Aminomethoxypolyethylene Glycol\* or Ammonium Sulfate or Amprolium or Anthracenedione\* or Anthraquinone\* or Antimony Potassium Tartrate or Antimony Sodium Gluconate or Apatites or Aqueous Nap or Arsanilic Acid or Arsenamide or Arsenates or Arsenazo III or Arsenicals or Arsenites or Arsphenamine or Ascorbic Acid\* or Auranofin or Aurothioglucose or Aurothioglycanide or Barium Sulfate or Bevenopran or Bisacodyl or Buckthorn or Budotitane or Butyltin or Butyltin Derivative or Cacodylic Acid or Calcium Citrate or Calcium Phosphates or Calcium Pyrophosphate or Calcium Sulfate or Carbonyl Iron or Carboplatin or Carboxyethylgermanium Sesquioxide or Carboxymethylcellulose or Casanthranol or Cascara or Castor Oil or Cathartic\* or Cephalac or Cetomacrogol or Chenodeoxycholic Acid or Chlormerodrin or Chloromercuribenzenesulfonic Acid or Chloromercuribenzoates or Chloromercurinitrophenols or Cholac or Chronulac or Cialit or Cilac or Citrate\* or Citric Acid\* or Citroma or Citrus Acida or Codanthramer or Codanthrusate or Colocynth Extract or Colyte or Constilac or Copper Sulfate or Cotton Seed Oil or Dantron or Dibasic Nap or Dibutyltin or Diethyl Sulfate or Diethylzinc or Dimethyl Sulfate or Diphosphates or Disaccharide or Disodium Hydrogen Phosphate or Docusate Calcium or Docusate Sodium or Dodecyl Sulfate or Dodecylsulfate Ammonium or Dolcanatide or Dulcolax or Duphalac or Durapatite or Elobixibat or Emetine or Emodin or Enema or Enulose or Etasulfate Sodium or Ethylmercuric Chloride or Ethylmercury Compound\* or Ethylmercury Derivative or Ferric Compound\* or Ferrocene or Ferroquine or Ferrous Compound\* or Fleet or Forlax or Fortans or Gadolinium DTPA or Generlac or Glycerol or Glycolax or Gold Sodium Thiomalate or Golitely or Golytely or Grignard Reagent or Halflytely or Hemiacidrin or Heptalac or Hydrogel or Hydroxyapatites or Hydroxymercuribenzoates or Hydroxymercuribenzoic Acid or Idrolax or Inositol Hexasulfate or Iron Carbonyl Compound\* or Iron Compound\* or Iron Dextran Complex or Isocitrates or Ispagula or Karaya Gum or Kristalose or Lactitol or Lactulose or Laxative\* or Linaclotide or Liquid Paraffin or Lubiprostone or Macrogol\* or Magnesium Citrate\* or Magnesium Hydroxide or Magnesium Oxide\* or Magnesium Sulfate\* or Maneb or Melarsoprol or Meralluride or Merbromin or Mercaptomerin or Mercuderamide or Mercumatilin or Mercuribenzoates or Mercuribenzoic Acid Derivative or Mercurobutol or Merethoxylline or Mersalyl or Methylcyclopentadienylmanganese Tricarbonyl or Methylmercuric Chloride or Methylmercury or Methylsamidorphane or "Milk of Magnesia" or Miralax or Mitoxantrone or Monobasic Nap or Movicol or Moviprep or Nap Tablet\* or Nonoxynol or Normacol or Nulitely or Nulytely or Octoxynol or Organogermanium Compound\* or Organogold Compound\* or Organolead Compound\* or Organolithium Compound\* or Organomercury Compound\* or Organometallic Compound\* or Organometallic Compound\* or Organoplatinum Compound\* or Organotechnetium Compound\* or Organotin Compound\* or Organotin Compound\* or Organotin Compound\* or Osmoprep or Osmotic or Oxyphenisatin Acetate or Oxyphenisatine or "P Azobenzeneearsonate" or "P Chloromercuribenzoic Acid" or PEG or "PEG 3350 SD" or "PEG ELS" or Phenolphthalein\* or Phenylmercuric Acetate or Phenylmercuric Borate or Phenylmercuric Nitrate or Phenylmercury Compound\* or Phenylmercury Derivative or Phosphate\* or Phosphoramides or Picolax or Picoline\* or Picosulfate Sodium or Plecanatide or "PMF 100" or Poloxalene or Poloxamer or Polycarbophil or Polyethylene Glycol\* or Polyhydroxyethyl Methacrylate or Polyoxyethylene Derivative\* or Polyoxyethylene Glycol\* or Polyphosphates or Polysorbates or Potassium Chloride\* or Potassium Citrate or Potassium Sulfate\* or Prepopik or Psyllium or Pyridoxal or Pyridoxamine or Pyridoxine or Recanaclotide or

Renacid or Rhein or Roxarsone or Ruthenocene Derivative or Salbutamol Sulfate or Salicylamide Sulfate or Senna Extract or Sennoside or Senokot or Sestamibi or "SF PEG ELS" or Sodium Bicarbonate\* or Sodium Chloride\* or Sodium Dihydrogen Phosphate or Sodium Phosphate\* or Sodium Picosulfate\* or Sodium Picosulphate\* or Sodium Sulfate\* or Sorbitol or Spirogermanium or Struvite or Suclear or Sucralfate\* or Sulfate\* or Sulphate\* or Suprep or "Technetium 99m" or "Technetium Tc 99m" or Tetradecyl Sulfate Sodium or Tetraethyl Lead or Tetraethyllead or Tetramethyllead or Thimerosal or Thiomersal or Thiosulfates or Titanocene or Transipeg or Trialkyltin Compound\* or Tributyltin or Triethyllead or Triethyltin or Trilyte or Trimethyltin or Triphenyltin or Urea Stibamine or Visicol or "Vitamin B 6" or "Vitamin B6" or Zinc Sulfate or Zineb or Zirconocene):ti,ab,kw 94825

#3 [mh "Inflammatory Bowel Diseases"] OR (Inflammatory Bowel Disease\* OR Crohn\* OR Ulcerative Colitis OR Ulcerative Colorectitis OR Ulcerative Proctocolitis OR Ulcerative Enteritis OR Regional Enteritis OR IBD).mp. 33438

#4 #1 AND #2 AND #3 in Trials 633

ClinicalTrials.gov  
Classic Interface  
**Advanced Search**

Search #1

**Condition or disease:** Inflammatory Bowel OR Crohn OR Ulcerative Colitis

**Study type:** Interventional Studies (Clinical Trials)

**Intervention/treatment:** Preparation OR Cleansing OR Lavage OR Purgation

84 Studies found

Search #2

**Condition or disease:** Inflammatory Bowel OR Crohn OR Ulcerative Colitis

**Study type:** Interventional Studies (Clinical Trials)

**Other terms:** Preparation OR Cleansing OR Lavage OR Purgation

133 Studies found

Embase via Ovid SP

Database: Embase <1980 to 2023 Week 35>

1 Randomized controlled trial/ or Controlled clinical study/ or randomization/ or intermethod comparison/ or double blind procedure/ or human experiment/ or (random\$ or placebo or (open adj label) or ((double or single or doubly or singly) adj (blind or blinded or blindly)) or parallel group\$1 or crossover or cross over or ((assign\$ or match or matched or allocation) adj5 (alternate or group\$1 or intervention\$1 or patient\$1 or subject\$1 or participant\$1)) or assigned or allocated or (controlled adj7 (study or design or trial)) or volunteer or volunteers).ti,ab. or (compare or compared or comparison or trial).ti. or ((evaluated or evaluate or evaluating or assessed or assess) and (compare or compared or comparing or comparison)).ab. (6221090)

2 (random\$ adj sampl\$ adj7 ("cross section\$" or questionnaire\$1 or survey\$ or database\$1)).ti,ab. not (comparative study/ or controlled study/ or randomi?ed controlled.ti,ab. or randomly assigned.ti,ab.) (9483)

3 Cross-sectional study/ not (randomized controlled trial/ or controlled clinical study/ or controlled study/ or (randomi?ed controlled or control group\$1).ti,ab.) (359189)

4 (((case adj control\$) and random\$) not randomi?ed controlled).ti,ab. (21421)

5 (Systematic review not (trial or study)).ti. (257153)

6 (nonrandom\$ not random\$).ti,ab. (18634)

7 ("Random field\$" or (random cluster adj3 sampl\$)).ti,ab. (4492)

8 (review.ab. and review.pt.) not trial.ti. (1123793)

9 "we searched".ab. and (review.ti. or review.pt.) (48947)

10 ("update review" or (databases adj4 searched)).ab. (62044)

11 (rat or rats or mouse or mice or swine or porcine or murine or sheep or lambs or pigs or piglets or rabbit or rabbits or cat or cats or dog or dogs or cattle or bovine or monkey or monkeys or trout or marmoset\$1).ti. and animal experiment/ (1163730)

12 Animal experiment/ not (human experiment/ or human/) (2416368)

13 or/2-12 (4182900)

14 1 not 13 (5485506)

15 Colonoscopy/ or Sigmoidoscopy/ or Endoscopy/ or (Colonoscop\* or Coloscop\* or Sigmoidoscop\* or Sigmoidoscop\* or Endoscop\*).mp. (594510)

16 Laxative/ or 8 Quinolinol Sulfate Plus Acetic Acid Plus Glycerol Plus Ricinoleic Acid/ or Acetic Acid Plus Disodium Hydrogen Phosphate Plus Gluconate Sodium Plus Magnesium Chloride Plus Potassium Chloride Plus Potassium Dihydrogen Phosphate Plus Sodium Chloride/ or Acetphenolisatin/ or Acetphenolisatin Plus Carboxymethylcellulose Plus Docusate Sodium/ or Acetphenolisatin Plus Docusate Sodium/ or Agar/ or Agarol/ or Aloe Emodin/ or Aloin/ or Aloin Plus Bile Extract Plus Cascara/ or Aluminum Hydroxide Plus Dicycloverine Plus Magnesium Oxide Plus Methylcellulose/ or Aluminum Hydroxide Plus Magnesium Hydroxide Plus Pipethanate Plus Scopolamine Methyl Nitrate/ or Balsam Peru Plus Castor Oil Plus Trypsin/

or Bevenopran/ or Bicarbonate Plus Bisacodyl Plus Macroglol 3350 Plus Potassium Chloride Plus Sodium Chloride/ or Bicarbonate Plus Calcium Chloride Plus Disodium Hydrogen Phosphate Plus Glucose Plus Magnesium Sulfate Plus Potassium Chloride Plus Sodium Chloride/ or Bisacodyl/ or Bisacodyl Tannex/ or Calcium Carbonate Plus Famotidine Plus Magnesium Hydroxide/ or Carboxymethylcellulose/ or Carboxymethylcellulose Plus Magnesium Hydroxide/ or Casanthranol Plus Docusate Sodium/ or Casanthranol Plus Poloxamer/ or Cascara/ or Cascara Sagrada/ or Cascara Salax/ or Castor Oil/ or Citric Acid Plus Magnesium Oxide Plus Picosulfate Sodium/ or Citric Acid Plus Magnesium Oxide Plus Sodium Carbonate/ or Codanthramer/ or Codanthrusate/ or Colocynth Extract/ or Colyte/ or Cotton Seed Oil/ or Dantron/ or Dantron Plus Docusate Calcium/ or Dipotassium Hydrogen Phosphate Plus Glucose Plus Lactate Sodium Plus Magnesium Chloride Plus Potassium Chloride Plus Sodium Chloride Plus Sodium Dihydrogen Phosphate/ or Disodium Hydrogen Phosphate/ or Disodium Hydrogen Phosphate Plus Methenamine Mandelate/ or Disodium Hydrogen Phosphate Plus Sodium Dihydrogen Phosphate/ or Docusate Calcium/ or Docusate Sodium/ or Docusate Sodium Plus Methylcellulose/ or Docusate Sodium Plus Phenolphthalein/ or Docusate Sodium Plus Senna Extract/ or Dolcanatide/ or Elobixibat/ or Emodin/ or Glucose Plus Lactate Potassium Plus Potassium Chloride Plus Sodium Chloride Plus Sodium Dihydrogen Phosphate/ or Glucose Plus Lactate Sodium Plus Magnesium Chloride Plus Potassium Chloride Plus Potassium Dihydrogen Phosphate Plus Sodium Dihydrogen Phosphate/ or Glycerol/ or Ispagula/ or Karaya Gum/ or Lactitol/ or Lactulose/ or Linaclotide/ or Liquid Paraffin/ or Lubiprostone/ or Macroglol 3350/ or Macroglol 4000/ or Magnesium Citrate/ or Magnesium Hydroxide/ or Magnesium Oxide/ or Magnesium Sulfate/ or Magnesium Sulfate Plus Potassium Chloride Plus Potassium Dihydrogen Phosphate Plus Sodium Chloride Plus Sodium Dihydrogen Phosphate/ or Magnesium Sulfate Plus Potassium Sulfate Plus Sodium Sulfate/ or Mannitol Plus Sorbitol/ or Methylsamidorphane/ or Moviprep/ or Neomycin Plus Polycarbophil Plus Thihexinol/ or Normacol/ or Oxyphenisatine/ or Phenolphthalein/ or Picosulfate Sodium/ or Plecanatide/ or Poloxamer/ or Polycarbophil/ or Polycarbophil Calcium/ or Polycarbophil Plus Thihexinol/ or Potassium Dihydrogen Phosphate Plus Sodium Dihydrogen Phosphate/ or Potassium Sulfate/ or Recanaclotide/ or Rhein/ or Rhein Anthrone/ or Senna Extract/ or Sennoside/ or Sennoside A/ or Sennoside B/ or Senokot/ or Sodium Dihydrogen Phosphate/ or Sodium Sulfate/ or Sorbitol/ or Organometallic Compound/ or Ascorbic Acid Plus Carbonyl Iron Plus Cyanocobalamin Plus Folic Acid/ or Aurothioglycanide/ or Budotitane/ or Carbonyl Iron/ or Diethylzinc/ or Ferrocene/ or Ferrocene Derivative/ or Ferroquine/ or Grignard Reagent/ or Methylcyclopentadienylmanganese Tricarbonyl/ or Organogermanium Compound/ or Organogold Compound/ or Organolead Compound/ or Organolithium Compound/ or Organomercury Compound/ or Organotin Compound/ or Ruthenocene Derivative/ or Titanocene/ or Titanocene Dichloride/ or Urea Stibamine/ or Zirconocene/ or Organogermanium Compound/ or 1 Isopropoxygermatrane/ or Carboxyethylgermanium Sesquioxide/ or Spirogermanium/ or Organolead Compound/ or Tetraethyllead/ or Tetramethyllead/ or Triethyllead/ or Organomercury Compound/ or "2 (Ethylmercurithio)Benzoxazole 5 Carboxylate Sodium"/ or 4 Aminophenylmercuric Acetate/ or 4 Chloromercuribenzoic Acid/ or Betaine Plus Mersalyl Plus Theophylline/ or Boric Acid Plus Macroglol Tert Dodecyl Thioether Plus Phenylmercuric Acetate/ or Chlormerodrin/ or Chloromercuribenzenesulfonic Acid/ or Ethylmercuric Chloride/ or Ethylmercury Derivative/ or Hydroxymercuribenzoic Acid/ or Meralluride/ or Merbromin/ or Mercaptomerin/ or Mercuderamide/ or Mercumatilin/ or Mercuribenzoic Acid Derivative/ or Mercurbutol/ or Merethoxylline/ or Merethoxylline Plus Theophylline/ or Mersalyl/ or Mersalyl Plus Theophylline/ or Methylmercuric Chloride/ or Methylmercury/ or Methylmercury Derivative/ or Phenylmercuric Acetate/ or Phenylmercuric Borate/ or Phenylmercuric Nitrate/ or Phenylmercury Derivative/ or Thiomersal/ or Organotin Compound/ or "Bis(Tributyltin) Oxide"/ or Butyltin/ or Butyltin Derivative/ or Dibutyltin/ or Dibutyltin Dichloride/ or Tributyltin/ or Tributyltin Chloride/ or Triethyltin/ or Trimethyltin/ or Triphenyltin/ or Triphenyltin Acetate/ or Triphenyltin Chloride/ or Triphenyltin Fluoride/ or Triphenyltin Hydroxide/ or Picoline Derivative/ or Macroglol Derivative/ or Phosphate/ or Sulfate/ or 4 Hydroxy 3 Methoxyphenylethylene Glycol Sulfate/ or Diethyl Sulfate/ or Dimethyl Sulfate/ or Dodecyl Sulfate/ or Dodecyl Sulfate Sodium/ or Dodecylsulfate Ammonium/ or Etasulfate Sodium/ or Etasulfate Sodium Plus Potassium Iodide/ or Inositol Hexasulfate/ or Salbutamol Sulfate/ or Salicylamide Sulfate/ or Tetradecyl Sulfate Sodium/ or (((Bowel\* or Colon\* or Intestin\* or Gut) adj3 (Preparat\* or Clean\* or Lavage\* or Evacuant\* or Purgati\*)) or "2

(Ethylmercurithio)Benzoxazole 5 Carboxylate Sodium" or "Bis(Tributyltin) Oxide" or "1 Isopropoxygermatrane" or "4 Aminophenylmercuric Acetate" or "4 Chloromercuribenzoic Acid" or "4 Hydroxy 3 Methoxyphenylethylene Glycol Sulfate" or "4-Chloromercuribenzenesulfonate" or Acetphenolisatin or Acidulated Phosphate Fluoride or Actilax or Agar or Agarol or Alkylmercury Compound\* or Aloe Emodin or Aloe Vera or Aloin or Alum Compound\* or Aminomethoxypolyethylene Glycol\* or Ammonium Sulfate or Amprolium or Anthracenedione\* or Anthraquinone\* or Antimony Potassium Tartrate or Antimony Sodium Gluconate or Apatites or Aqueous Nap or Arsanilic Acid or Arsenamide or Arsenates or Arsenazo III or Arsenicals or Arsenites or Arsphenamine or Ascorbic Acid\* or Auranofin or Aurothioglucose or Aurothioglycanide or Barium Sulfate or Bevenopran or Bisacodyl or Buckthorn or Budotitane or Butyltin or Butyltin Derivative or Cacodylic Acid or Calcium Citrate or Calcium Phosphates or Calcium Pyrophosphate or Calcium Sulfate or Carbonyl Iron or Carboplatin or Carboxyethylgermanium Sesquioxide or Carboxymethylcellulose or Casanthranol or Cascara or Castor Oil or Cathartic\* or Cephulac or Cetomacrogol or Chenodeoxycholic Acid or Chlormerodrin or Chloromercuribenzenesulfonic Acid or Chloromercuribenzoates or Chloromercurinitrophenols or Cholac or Chronulac or Cialit or Cilac or Citrate\* or Citric Acid\* or Citroma or Citrus Acida or Codanthramer or Codanthrusate or Colocynth Extract or Colyte or Constilac or Copper Sulfate or Cotton Seed Oil or Dantron or Dibasic Nap or Dibutyltin or Diethyl Sulfate or Diethylzinc or Dimethyl Sulfate or Diphosphates or Disaccharide or Disodium Hydrogen Phosphate or Docusate Calcium or Docusate Sodium or Dodecyl Sulfate or Dodecylsulfate Ammonium or Dolcanatide or Dulcolax or Duphalac or Durapatite or Elobixibat or Emetine or Emodin or Enema or Enulose or Etasulfate Sodium or Ethylmercuric Chloride or Ethylmercury Compound\* or Ethylmercury Derivative or Ferric Compound\* or Ferrocene or Ferroquine or Ferrous Compound\* or Fleet or Forlax or Fortans or Gadolinium DTPA or Generlac or Glycerol or Glycolax or Gold Sodium Thiomalate or Golitely or Golytely or Grignard Reagent or Halflytely or Hemiacidrin or Heptalac or Hydrogel or Hydroxyapatites or Hydroxymmercuribenzoates or Hydroxymmercuribenzoic Acid or Idrolax or Inositol Hexasulfate or Iron Carbonyl Compound\* or Iron Compound\* or Iron Dextran Complex or Isocitrates or Ispagula or Karaya Gum or Kristalose or Lactitol or Lactulose or Laxative\* or Linaclotide or Liquid Paraffin or Lubiprostone or Macrogol\* or Magnesium Citrate\* or Magnesium Hydroxide or Magnesium Oxide\* or Magnesium Sulfate\* or Maneb or Melarsoprol or Meralluride or Merbromin or Mercaptomerin or Mercuderamide or Mercumatilin or Mercuribenzoates or Mercuribenzoic Acid Derivative or Mercurobutol or Merethoxylline or Mersalyl or Methylcyclopentadienylmanganese Tricarbonyl or Methylmercuric Chloride or Methylmercury or Methylsamidorphane or "Milk of Magnesia" or Miralax or Mitoxantrone or Monobasic Nap or Movicol or Moviprep or Nap Tablet\* or Nonoxynol or Normacol or Nulitely or Nulytely or Octoxynol or Organogermanium Compound\* or Organogold Compound\* or Organolead Compound\* or Organolithium Compound\* or Organomercury Compound\* or Organometallic Compound\* or Organometallic Compound\* or Organoplatinum Compound\* or Organotechnetium Compound\* or Organotin Compound\* or Organotin Compound\* or Organotin Compound\* or Osmoprep or Osmotic or Oxyphenisatin Acetate or Oxyphenisatine or "P Azobenzene arsonate" or "P Chloromercuribenzoic Acid" or PEG or "PEG 3350 SD" or "PEG ELS" or Phenolphthalein\* or Phenylmercuric Acetate or Phenylmercuric Borate or Phenylmercuric Nitrate or Phenylmercury Compound\* or Phenylmercury Derivative or Phosphate\* or Phosphoramides or Picolax or Picoline\* or Picosulfate Sodium or Plecanatide or "PMF 100" or Poloxalene or Poloxamer or Polycarbophil or Polyethylene Glycol\* or Polyhydroxyethyl Methacrylate or Polyoxyethylene Derivative\* or Polyoxyethylene Glycol\* or Polyphosphates or Polysorbates or Potassium Chloride\* or Potassium Citrate or Potassium Sulfate\* or Prepopik or Psyllium or Pyridoxal or Pyridoxamine or Pyridoxine or Recanaclotide or Renacid or Rhein or Roxarsone or Ruthenocene Derivative or Salbutamol Sulfate or Salicylamide Sulfate or Senna Extract or Sennoside or Senokot or Sestamibi or "SF PEG ELS" or Sodium Bicarbonate\* or Sodium Chloride\* or Sodium Dihydrogen Phosphate or Sodium Phosphate\* or Sodium Picosulfate\* or Sodium Picosulphate\* or Sodium Sulfate\* or Sorbitol or Spirogermanium or Struvite or Suclear or Sucralfate\* or Sulfate\* or Sulphate\* or Suprep or "Technetium 99m" or "Technetium Tc 99m" or Tetradecyl Sulfate Sodium or Tetraethyl Lead or Tetraethyllead or Tetramethyllead or Thimerosal or Thiomersal or Thiosulfates or Titanocene or Transipeg or Trialkyltin Compound\* or Tributyltin or Triethyllead or



Triethyltin or Trilyte or Trimethyltin or Triphenyltin or Urea Stibamine or Visicol or "Vitamin B 6" or "Vitamin B6" or Zinc Sulfate or Zineb or Zirconocene).mp. (2100164)

17 exp inflammatory bowel disease/ or (inflammatory bowel disease\* or crohn\* or ulcerative colitis or ulcerative coloproctitis or ulcerative proctocolitis or ulcerative enteritis or regional enteritis or IBD).mp. (236169)

18 and/14-17 (1467)

MEDLINE via Ovid SP

Database: Ovid MEDLINE(R) ALL <1946 to September 06, 2023>

1 Colonoscopy/ or Sigmoidoscopy/ or Endoscopy/ or (Colonoscop\* or Coloscop\* or Sigmoidoscop\* or Sigmoideoscop\* or Endoscop\*).mp. (326873)

2 exp Cathartics/ or exp Anthraquinones/ or exp Citrates/ or exp Laxatives/ or exp Organometallic Compounds/ or exp Picolines/ or exp Polyethylene Glycols/ or exp Phosphates/ or (((Bowel\* or Colon\* or Intestin\* or Gut) adj3 (Preparat\* or Clean\* or Lavage\* or Evacuant\* or Purgati\*)) or "2 (Ethylmercurithio)Benzoxazole 5 Carboxylate Sodium" or "Bis(Tributyltin) Oxide" or "1 Isopropoxygermatrane" or "4 Aminophenylmercuric Acetate" or "4 Chloromercuribenzoic Acid" or "4 Hydroxy 3 Methoxyphenylethylene Glycol Sulfate" or "4-Chloromercuribenzenesulfonate" or Acetphenolisatin or Acidulated Phosphate Fluoride or Actilax or Agar or Agarol or Alkylmercury Compound\* or Aloe Emodin or Aloe Vera or Aloin or Alum Compound\* or Aminomethoxypolyethylene Glycol\* or Ammonium Sulfate or Amprolium or Anthracenedione\* or Anthraquinone\* or Antimony Potassium Tartrate or Antimony Sodium Gluconate or Apatites or Aqueous Nap or Arsanilic Acid or Arsenamide or Arsenates or Arsenazo III or Arsenicals or Arsenites or Arsphenamine or Ascorbic Acid\* or Auranofin or Aurothioglucose or Aurothioglycanide or Barium Sulfate or Bevenopran or Bisacodyl or Buckthorn or Budotitane or Butyltin or Butyltin Derivative or Cacodylic Acid or Calcium Citrate or Calcium Phosphates or Calcium Pyrophosphate or Calcium Sulfate or Carbonyl Iron or Carboplatin or Carboxyethylgermanium Sesquioxide or Carboxymethylcellulose or Casanthranol or Cascara or Castor Oil or Cathartic\* or Cephulac or Cetomacrogol or Chenodeoxycholic Acid or Chlormerodrin or Chloromercuribenzenesulfonic Acid or Chloromercuribenzoates or Chloromercurinitrophenols or Cholac or Chronulac or Cialit or Cilac or Citrate\* or Citric Acid\* or Citroma or Citrus Acida or Codanthramer or Codanthrusate or Colocynth Extract or Colyte or Constilac or Copper Sulfate or Cotton Seed Oil or Dantron or Dibasic Nap or Dibutyltin or Diethyl Sulfate or Diethylzinc or Dimethyl Sulfate or Diphosphates or Disaccharide or Disodium Hydrogen Phosphate or Docusate Calcium or Docusate Sodium or Dodecyl Sulfate or Dodecylsulfate Ammonium or Dolcanatide or Dulcolax or Duphalac or Durapatite or Elobixibat or Emetine or Emodin or Enema or Enulose or Etasulfate Sodium or Ethylmercuric Chloride or Ethylmercury Compound\* or Ethylmercury Derivative or Ferric Compound\* or Ferrocene or Ferroquine or Ferrous Compound\* or Fleet or Forlax or Fortans or Gadolinium DTPA or Generlac or Glycerol or Glycolax or Gold Sodium Thiomalate or Golitely or Golytely or Grignard Reagent or Halflytely or Hemiacidrin or Heptalac or Hydrogel or Hydroxyapatites or Hydroxymmercuribenzoates or Hydroxymmercuribenzoic Acid or Idrolax or Inositol Hexasulfate or Iron Carbonyl Compound\* or Iron Compound\* or Iron Dextran Complex or Isocitrates or Ispagula or Karaya Gum or Kristalose or Lactitol or Lactulose or Laxative\* or Linaclotide or Liquid Paraffin or Lubiprostone or Macrogol\* or Magnesium Citrate\* or Magnesium Hydroxide or Magnesium Oxide\* or Magnesium Sulfate\* or Maneb or Melarsoprol or Meralluride or Merbromin or Mercaptomerin or Mercuderamide or Mercumatilin or Mercuribenzoates or Mercuribenzoic Acid Derivative or Mercurobutol or Merethoxylline or Mersalyl or Methylcyclopentadienylmanganese Tricarbonyl or Methylmercuric Chloride or Methylmercury or Methylsamidorphane or "Milk of Magnesia" or Miralax or Mitoxantrone or Monobasic Nap or Movicol or Moviprep or Nap Tablet\* or Nonoxynol or Normacol or Nulitely or Nulytely or Octoxynol or Organogermanium Compound\* or Organogold Compound\* or Organolead Compound\* or Organolithium Compound\* or Organomercury Compound\* or Organometallic Compound\* or Organometallic Compound\* or Organoplatinum Compound\* or Organotechnetium Compound\* or Organotin Compound\* or Organotin Compound\* or Organotin Compound\* or Osmoprep or Osmotic or Oxyphenisatin Acetate or Oxyphenisatine or "P Azobenzene arsonate" or "P Chloromercuribenzoic Acid" or PEG or "PEG 3350 SD" or "PEG ELS" or

Phenolphthalein\* or Phenylmercuric Acetate or Phenylmercuric Borate or Phenylmercuric Nitrate or Phenylmercury Compound\* or Phenylmercury Derivative or Phosphate\* or Phosphoramides or Picolax or Picoline\* or Picosulfate Sodium or Plecanatide or "PMF 100" or Poloxalene or Poloxamer or Polycarbophil or Polyethylene Glycol\* or Polyhydroxyethyl Methacrylate or Polyoxyethylene Derivative\* or Polyoxyethylene Glycol\* or Polyphosphates or Polysorbates or Potassium Chloride\* or Potassium Citrate or Potassium Sulfate\* or Prepopik or Psyllium or Pyridoxal or Pyridoxamine or Pyridoxine or Recanaclotide or Renacid or Rhein or Roxarsone or Ruthenocene Derivative or Salbutamol Sulfate or Salicylamide Sulfate or Senna Extract or Sennoside or Senokot or Sestamibi or "SF PEG ELS" or Sodium Bicarbonate\* or Sodium Chloride\* or Sodium Dihydrogen Phosphate or Sodium Phosphate\* or Sodium Picosulfate\* or Sodium Picosulphate\* or Sodium Sulfate\* or Sorbitol or Spirogermanium or Struvite or Suclear or Sucralfate\* or Sulfate\* or Sulphate\* or Suprep or "Technetium 99m" or "Technetium Tc 99m" or Tetradecyl Sulfate Sodium or Tetraethyl Lead or Tetraethyllead or Tetramethyllead or Thimerosal or Thiomersal or Thiosulfates or Titanocene or Transipeg or Trialkyltin Compound\* or Tributyltin or Triethyllead or Triethyltin or Trilyte or Trimethyltin or Triphenyltin or Urea Stibamine or Visicol or "Vitamin B 6" or "Vitamin B6" or Zinc Sulfate or Zineb or Zirconocene).mp. (1509837)

3 exp Inflammatory Bowel Diseases/ or (Inflammatory Bowel Disease\* or Crohn\* or Ulcerative Colitis or Ulcerative Coloproctitis or Ulcerative Proctocolitis or Ulcerative Enteritis or Regional Enteritis or IBD).mp. (140601)

4 ((Randomized Controlled Trial or Controlled Clinical Trial).pt. or (Randomized or Placebo or Randomly or Trial or Groups).ab. or Drug Therapy.fs.) not (exp Animals/ not Humans.sh.) (5037138)

5 and/1-4 (424)

WHO ICTRP

(Inflammatory Bowel OR Crohn OR Ulcerative Colitis) AND (Preparation OR Cleansing OR Lavage OR Purgation)

83 records for 77 trials

Cost effectiveness:

---

**Database: Embase <1974 to 2024 February 28>, Ovid MEDLINE(R) ALL <1946 to February 28, 2024>**

**Search Strategy:**

- 1** exp Inflammatory Bowel Disease/ or (Crohn\* or Ulcerative Colitis\* or IBD or Inflammatory Bowel Disease\*).mp. (393574)
  - 2** (Colon or Colorectal or Rectal).mp. (1352832)
  - 3** (Cancer\* or Neoplas\* or Dysplasia).mp. (9334511)
  - 4** (Detect\* or Screen\* or Diagnos\* or Assess\* or Surveillance).mp. (27748692)
  - 5** and/1-4 (22971)
  - 6** (cost or costs or cost-analysis or cost-effectiveness or cost-utility analysis or cost-benefit analysts or quality adjusted life years or QALYs).mp. (2118467)
  - 7** exp "Costs and Cost Analysis"/ (683269)
  - 8** 5 and (6 or 7) (1109)
  - 9** remove duplicates from 8 (916)
  - 10** limit 9 to english language (882)
  - 11** conference abstract.pt. (5063003)
  - 12** conference review.pt. (15659)
  - 13** 10 not (11 or 12) (584)
  - 14** limit 13 to yr="2014 - 2024" (294)
-
